# Supplementary material for: Environmental temperature alters the overall digestive energetics and differentially affects dietary protein and lipid use in a lizard
Source: Oxford University Press journal article supplement (doi:10.1242/jeb.194480), 2019-03-15
Supplement: jeb194480supp.pdf [file jeb194480supp.pdf]

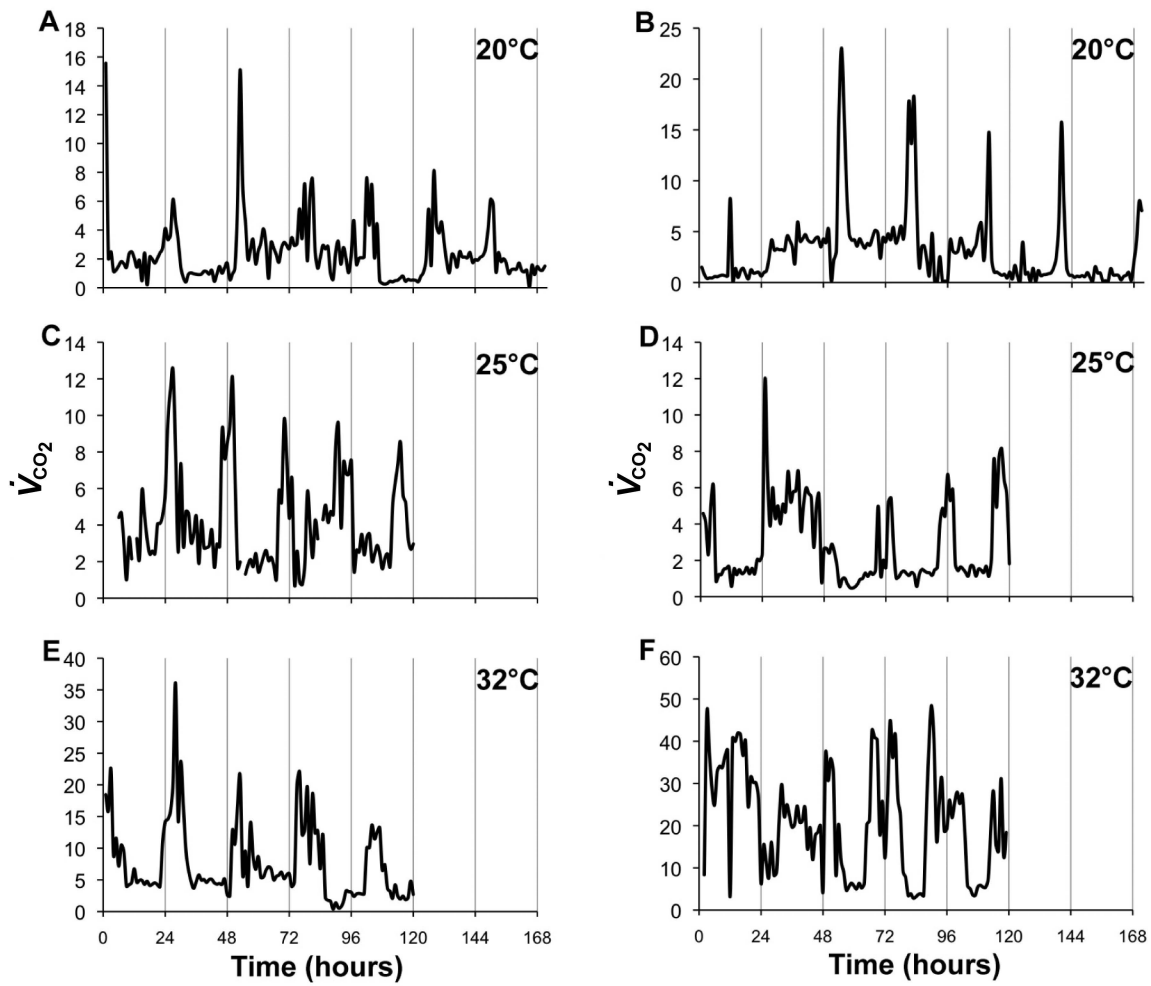

**Figure S1. Circadian rhythm during the SDA response.** Mean metabolic rate of two individual lizards of the species *Agama atra* at three temperatures: 20°C (A, B), 25°C (C, D) and 32°C (E, F). Metabolic rate was measured during 7 min each hour (see methods). Vertical lines represent 24-hour periods.
